11 **Running title:** Internal reference panels for imputation

12 **Key words:** algorithms, imputation, polymorphic sites, sequencing, study design

13 **Corresponding author:**

14 Jonathan T. L. Kang

15 Department of Biology, Stanford University

16 371 Serra Mall, Stanford, CA 94305

17 (650) 724-5122

18 [jtlkang@stanford.edu](mailto:jtlkang@stanford.edu)

19

## ABSTRACT

20 Imputation of genotypes in a study sample can make use of sequenced or densely genotyped  
21 external reference panels consisting of individuals that are not from the study sample. It can  
22 also employ internal reference panels, incorporating a subset of individuals from the study  
23 sample itself. Internal panels offer an advantage over external panels, as they can reduce  
24 imputation errors arising from genetic dissimilarity between a population of interest and a  
25 second, distinct population from which the external reference panel has been constructed.  
26 As the cost of next-generation sequencing decreases, internal reference panel selection is  
27 becoming increasingly feasible. However, it is not clear how best to select individuals to  
28 include in such panels. We introduce a new method for selecting an internal reference panel—  
29 minimizing the average distance to the closest leaf (ADCL)—and compare its performance  
30 relative to an earlier algorithm: maximizing phylogenetic diversity (PD). Employing both  
31 simulated data and sequences from the 1000 Genomes Project, we show that ADCL provides  
32 a significant improvement in imputation accuracy, especially for imputation of sites with low-  
33 frequency alleles. This improvement in imputation accuracy is robust to changes in reference  
34 panel size, marker density, and length of the imputation target region.

35

## INTRODUCTION

36 Owing to the existence of genetic variation within species, geneticists routinely make choices  
37 about which individuals, inbred strains, or representatives of populations or breeds merit  
38 prioritization for genotyping or DNA sequencing. Often, such choices, though typically  
39 made by informal criteria, reflect an explicit or implicit goal of maximizing the potential for  
40 extrapolating the information in the genotyped or sequenced individuals to all members of  
41 a breed, population, or species of interest.

42 Genotype imputation algorithms infer unobserved genotypes by matching a set of markers  
43 to the haplotype patterns observed in a reference sample (LI *et al.* 2009; MARCHINI AND  
44 HOWIE 2010), adding a new dimension to these choices. Reference panels that are used  
45 to facilitate genotype imputation in other individuals beyond the members of the panels  
46 themselves can often be optimally selected to formally maximize the imputed genotypic  
47 information obtained about those other individuals of interest (KANG AND MARJORAM  
48 2012; ZHANG *et al.* 2013; PEIL *et al.* 2015). The evaluation of alternative ways to select  
49 imputation reference panels thus provides an approach for making sample choices for major  
50 genotyping or sequencing studies more systematically generalizable.

51 When conducting genotype imputation studies in a population sample, reference panels have  
52 generally been selected from databases external to the sample, such as the 1000 Genomes  
53 Project (1000 GENOMES PROJECT CONSORTIUM 2010) and the International HapMap  
54 Consortium (INTERNATIONAL HAPMAP CONSORTIUM 2005) databases. As a result of the  
55 rapidly decreasing cost of sequencing, however, it has become increasingly possible to carry  
56 out *internal* reference panel selection, in which additional sequencing is performed on a  
57 subset of the study sample, and the sequenced subset is then used to impute the remaining  
58 haplotypes. The use of reference sequences that originate from the study sample itself  
59 can reduce the potential mismatch of ancestral backgrounds between sample and reference  
60 populations, decreasing imputation errors. It also allows for genetic variants unique to the  
61 sample population to be successfully imputed (FRIDLEY *et al.* 2010; ZHANG *et al.* 2013).

62 Previous studies have observed that a mismatch in population origins between reference  
63 panels and study samples can reduce imputation accuracy compared to when they originate  
64 from the same or similar populations (HUANG *et al.* 2009, 2011; LI *et al.* 2010; PAŞANIUC *et*  
65 *al.* 2010; SHRINER *et al.* 2010; SURAKKA *et al.* 2010). JEWETT *et al.* (2012) demonstrated,  
66 using a coalescent model, that with other variables held constant, smaller internal reference  
67 panels are often likely to outperform larger external reference panels, despite the difference

68 in panel size. Empirical studies have also shown that using an internal reference panel drawn  
69 from a subset of the sample under study, in addition to an external reference panel, gives  
70 rise to an increase in imputation accuracy over just using the external reference panel alone  
71 (FRIDLEY *et al.* 2010; SAMPSON *et al.* 2012; KREINER-MØLLER *et al.* 2015).

72 The value of internal reference panels for imputation studies raises the question of how an in-  
73 ternal panel should be selected. Two recent studies have proposed maximizing “phylogenetic  
74 diversity” (PD) as a criterion for internal reference panel selection (KANG AND MARJORAM  
75 2012; ZHANG *et al.* 2013). In this approach, the phylogenetic diversity of a set of haplotypes  
76 is defined as the total branch length of a tree spanned by the haplotypes (FAITH 1992; HART-  
77 MANN AND STEEL 2007). Given a panel size, the goal is to select the subset of haplotypes  
78 whose subtree yields the longest total branch length. Conceptually, the idea of seeking a  
79 maximally diverse subset of haplotypes in the reference panel aims to sample haplotypes that  
80 best cover the full range of haplotypes observed in the sample. The maximum-PD panel, by  
81 choosing haplotypes from different regions of the tree of haplotypes (FIGURE 1B), is more  
82 likely than a random panel to supply the necessary diversity to impute sites localized in a  
83 subgroup within the entire sample population. ZHANG *et al.* (2013) showed, using simulated  
84 sequence data and data from the 1000 Genomes Project, that by using the maximum-PD  
85 panel, higher imputation accuracy is obtained, and more sites are imputed as polymorphic in  
86 the sample population, than if the reference panel consists of randomly-selected haplotypes.

87 Despite the utility of maximizing PD as a method for the selection of an internal reference  
88 panel, other approaches focusing on different principles might be preferable. Because the  
89 algorithm explicitly chooses haplotypes that are genetically distant from one another, long,  
90 pendant branches of the tree, if present, are likely to be chosen (BORDEWICH *et al.* 2008).  
91 The haplotypes associated with such branches might not be representative of the sample at  
92 large. These haplotypes might contain a large amount of sequencing error or missing data,  
93 and their inclusion in the reference panel might not contribute substantially to an increase

94 in imputation accuracy. Even if they have high-quality data, such haplotypes are relatively  
95 unique in the sample, and therefore might assist as imputation templates only for a small  
96 number of sampled lineages.

97 PD can be viewed as emphasizing “diversity” of the internal reference panel rather than  
98 “representativeness.” To determine if an alternative focused on identifying the most repre-  
99 sentative subsample for use as the internal reference panel is preferable, we explore a new  
100 method: minimizing the average distance to the closest leaf (ADCL), which identifies refer-  
101 ence haplotypes based on their genetic proximity to the rest of the sample haplotypes. We  
102 compare the imputation accuracy of the maximum-PD, minimum-ADCL, and random refer-  
103 ence panels on both simulated data and data from the 1000 Genomes Project, and find that  
104 the minimum-ADCL panel consistently provides higher imputation accuracy, irrespective of  
105 changes to parameters such as reference panel size, marker density, and sequence length.

106

## METHODS

### 107 **Maximizing phylogenetic diversity (PD)**

108 Given a tree of  $n$  haplotypes, to select a reference panel of haplotypes whose subtree spans  
109 the longest branch length, ZHANG *et al.* (2013) considered a greedy algorithm that takes as  
110 inputs the tree and a parameter  $k \leq n$ , the desired number of haplotypes for the panel. Let  
111  $X$  be the  $k$ -element subset of the sample haplotypes chosen for the reference panel, and let  
112  $T_X$  be the subtree spanned by the haplotypes in  $X$ . The algorithm first selects the haplotype  
113 pair that is phylogenetically most distant (i.e. largest pairwise branch length), and adds both  
114 haplotypes to  $X$ .  $T_X$  now consists of a single pair of branches. Sequentially, the haplotype  
115 that is the most distant from  $T_X$  is placed into  $X$ , updating  $T_X$  with each inclusion. This  
116 process continues until the required  $k$  haplotypes have been selected (FIGURE 1B).

117 PARDI AND GOLDMAN (2005) and STEEL (2005) proved that among all possible subsets of  
118 size  $k \leq n$  haplotypes from the study sample, the greedy algorithm achieves the globally  
119 maximal PD. Thus, the selection of the “most diverse” reference panel is computationally  
120 efficient, as there is no need to exhaustively examine all possible panels of size  $k$  in order  
121 to arrive at the correct solution. In addition, because the selection algorithm is greedy, the  
122 haplotypes in the reference panel can be ranked by their order of inclusion, in which every  
123 haplotype added contributes a non-increasing amount of PD. The maximum-PD panels of  
124 size 2 to  $k$  form a series of nested sets, and all previously selected haplotypes in a panel of  
125 size smaller than  $k$  will also be included in a panel of size  $k$ .

## 126 **Minimizing the average distance to the closest leaf (ADCL)**

127 **Overview of ADCL:** Instead of focusing on diversity in the selected set and targeting  
128 the potential for accurate imputation of unusual haplotypes, the minimum-ADCL algorithm  
129 focuses on representativeness, aiming to maximize imputation accuracy of typical haplotypes  
130 likely to appear in a sample. The problem can be viewed as choosing the haplotypes that are,  
131 on average, genealogically closest to the remaining haplotypes not included in the reference  
132 panel. As in the case of PD, the algorithm takes as inputs a tree of the  $n$  haplotypes in the  
133 study sample, and a parameter  $k \leq n$ , indicating the desired reference panel size.

134 Let  $H$  be the set of  $n$  haplotypes, and let  $X$  be the selected  $k$ -element subset of  $H$ . The  
135 objective is then to find  $X$  such that the branch-length distance from a randomly-chosen  
136 haplotype in  $H$  to its closest neighboring haplotype in  $X$  is minimized over all possible  $k$ -  
137 element subsets of  $H$  (MATSEN *et al.* 2013). Note that because the haplotypes in  $X$  are also  
138 in  $H$ , each of these haplotypes is its own closest neighbor, and we can equivalently consider  
139 either  $H$  or  $H \setminus X$ . In essence, the goal is to return a set of reference panel haplotypes that  
140 occupy the most central positions within clusters of the tree (FIGURE 1C).

141 In a detailed study of ADCL, MATSEN *et al.* (2013) demonstrated that unlike when choosing  
142 the subset that maximizes PD, the greedy algorithm need not give rise to the globally-optimal  
143 ADCL solution. It is therefore necessary to produce alternative algorithms that seek to  
144 minimize ADCL. Note that because the greedy algorithm is not applicable, the haplotypes  
145 selected cannot be ranked by their order of inclusion, as a haplotype included in a subset of  
146 size smaller than  $k$  is not necessarily also included in a subset of size  $k$  (FIGURE 1C).

#### 147 **Adapted partitioning-around-medoids (PAM) algorithm for minimizing ADCL:**

148 MATSEN *et al.* (2013) described two algorithms which, for a given set of haplotypes, seek to  
149 produce the subset of size  $k$  that minimizes ADCL. The first approach leverages similarities  
150 between the problem of minimizing ADCL and the technique known as  $k$ -medoids clustering  
151 (KAUFMAN AND ROUSSEEUW 1987). In the  $k$ -medoids problem, a set of data points is  
152 partitioned into  $k$  clusters, where  $k$  is predetermined. Within each cluster, a single point is  
153 designated as the center. The  $k$ -medoids clustering method is similar to  $k$ -means clustering.  
154 In the  $k$ -medoids approach, however, each cluster center is chosen from the original set of data  
155 points, whereas  $k$ -means has no such restriction. The objective function to be minimized in  
156 the  $k$ -medoids problem is the distance from a random data point to the center of the cluster  
157 to which it is assigned. A cluster center can be viewed as the data point most representative  
158 of the remainder of the data points within the cluster.

159 It is then clear how the problem of minimizing ADCL is analogous to the  $k$ -medoids problem.  
160 A data point is a haplotype, and distances between data points are branch-length (patristic)  
161 distances between haplotypes. The  $k$  cluster centers are akin to the  $k$  haplotypes that are  
162 selected.

163 As with minimizing ADCL, there is no greedy algorithm that solves the  $k$ -medoids prob-  
164 lem, and obtaining the globally optimal solution has been demonstrated to be NP-hard  
165 (SHENG AND LIU 2004). A widely-used  $k$ -medoids heuristic algorithm is the partitioning-



166 around-medoids (PAM) algorithm (THEODORIDIS AND KOUTROUMBAS 2008), which works  
167 by randomly selecting  $k$  medoids from the original set of  $n$  data points, and then minimizing  
168 the objective function via hill-climbing. One iteration of the algorithm consists of looping  
169 over all  $k(n - k)$  possible pairs containing a medoid and non-medoid, exchanging the medoid  
170 statuses of the points in the pair, and recording the new value of the objective function from  
171 the updated arrangement. Among all  $k(n - k)$  proposed exchanges, the single exchange that  
172 leads to the lowest-cost configuration is chosen. The algorithm then enters a new iteration,  
173 and the process repeats until no further changes to the set of medoids take place.

174 The first approach MATSEN *et al.* (2013) considered for minimizing ADCL is an adaptation  
175 of the PAM algorithm. First, the set  $X$  of haplotypes included in the reference panel is  
176 initialized by randomly selecting, without replacement,  $k$  haplotypes from the initial set  $H$   
177 of  $n$  haplotypes. Next, the following loop over the haplotypes  $x_1, \dots, x_k \in X$  is executed  
178 until no exchanges occur for one complete iteration over every  $x_i \in X$ :

- 179 (1) For a haplotype  $x_i \in X$ , remove it from  $X$  and attempt to replace it with every other  
180  $y \in H \setminus X$  in its place.
- 181 (2) Keep the best such exchange if it decreases ADCL.
- 182 (3) Continue with  $x_{i+1} \in X$ . In the case of  $x_k$ , continue with  $x_1$ .

183 This method for minimizing ADCL differs from the original formulation of the PAM algo-  
184 rithm in that it evaluates potential exchanges one medoid at a time, instead of examining  
185 all  $k(n - k)$  medoid/non-medoid pairs before finding the exchange that most decreases the  
186 objective function (MATSEN *et al.* 2013). Because each step in the iteration causes the value  
187 of ADCL to either stay constant or decrease, the solution is guaranteed to converge on a  
188 local minimum. However, the algorithm remains a heuristic approach, and the minimum-  
189 ADCL solution it achieves could depend on the specific haplotypes selected during random  
190 initialization. Hence, the global minimum might not always be found.

191 Alongside the adapted PAM algorithm, MATSEN *et al.* (2013) also developed a second ap-  
192 proach: an exact but more computationally-intensive algorithm that is guaranteed to find  
193 the global-minimum ADCL solution. Both algorithms were implemented in the `rppr` bi-  
194 nary in the `pplacer` suite of programs. Comparing between the two, MATSEN *et al.* (2013)  
195 demonstrated that for their simulated test sets, the adapted PAM algorithm only rarely gets  
196 trapped in local minima. For computational efficiency, we therefore chose to use the adapted  
197 PAM algorithm rather than the slower exact algorithm, first testing that in our setting, mul-  
198 tiple runs of the adapted PAM algorithm with different initial seeds select a large percentage  
199 of the same haplotypes (see RESULTS).

## 200 **Simulated sequence data**

201 To evaluate how the maximum-PD and minimum-ADCL panels perform relative to one an-  
202 other, we analyzed simulated data sets produced by the coalescent-based sequence sampling  
203 program `ms` (HUDSON 2002), closely following the parameters used by ZHANG *et al.* (2013)  
204 to ensure that the results are comparable.

205 First, we independently generated 50 data sets, each consisting of 2000 1Mb haplotypes,  
206 assuming a constant effective population size of  $N_e = 10,000$ , a mutation rate of  $\mu = 10^{-8}$   
207 per site per generation, and a recombination rate of  $\rho = 10^{-8}$  per site per generation. The  
208 parameter values provided to `ms` were as follows: `nsam = 2000`, `nreps = 50`, `-t = 400`, `-r =`  
209 `400` and `nsites = 106`. From the simulated data sets, we removed all singleton sites to ensure  
210 that the sequence data were truly imputable. Within a data set, if the  $n = 2000$  haplotypes  
211 contained  $q$  polymorphic sites after excluding the singletons, we randomly selected, without  
212 replacement,  $s = 300$  of the  $q$  sites, each with minor allele frequency (MAF) greater than  
213 0.1. These markers were treated as genotyped. The remaining  $q - s$  sites were masked.

214 Following ZHANG *et al.* (2013), we calculated the pairwise Hamming distances between the  
215  $n = 2000$  haplotypes in each of the 50 data sets, based on the genotype information at only  
216 the  $s = 300$  randomly-selected markers. With these distances, we then used the software  
217 `rapidnj` (SIMONSEN *et al.* 2008) to construct a neighbor-joining tree (SAITOU AND NEI  
218 1987) of the haplotypes. Note that it was possible, as a result of random sampling, for two  
219 or more haplotypes to be identical at all  $s$  markers. In such a case, a leaf in the tree would  
220 represent more than one haplotype.

221 Using the python library `dendropy` (SUKUMARAN AND HOLDER 2010), we calculated the  
222 patristic distance matrix for each neighbor-joining tree. We then applied the greedy algo-  
223 rithm to select the reference panel of size  $k = 200$  that maximizes PD. Furthermore, on each  
224 neighbor-joining tree, we used the `rppr` binary in `ppplacer` (MATSEN *et al.* 2013) to execute  
225 the adapted PAM algorithm, returning a reference panel of size  $k = 200$  that minimizes  
226 ADCL. In cases for which either algorithm selected a leaf that represents more than one  
227 haplotype, one of the haplotypes was randomly chosen to be included in the panel.

228 In order to model diploid samples, we also created diploid reference panels for use with both  
229 the maximum-PD and minimum-ADCL algorithms. First, we randomly paired the  $n = 2000$   
230 haplotypes into 1000 diploid genomes. For the “diploid PD” panel, following ZHANG *et*  
231 *al.* (2013), we included diploid individuals carrying at least one of the top-ranked haplotypes  
232 into the panel until we reached the desired panel size  $k$ . More specifically, we proceeded down  
233 the list of  $k$  haplotypes in the maximum-PD panel, ranked based on the order of inclusion.  
234 At each step, we selected both the top-ranked haplotype and the haplotype with which it  
235 was paired (and which was not necessarily top-ranked) for the diploid panel, if they had not  
236 already been picked previously. We continued this process until  $k/2$  diploid genomes were  
237 selected, for a total of  $k$  haplotypes.

238 Unlike in maximum-PD panels, haplotype sets in minimum-ADCL panels are not nested.  
239 Therefore, we cannot use the same process to construct the “diploid ADCL” panel. To  
240 address this problem, we first constructed, again using `rppr`, a half-sized minimum-ADCL  
241 panel of size  $k/2 = 100$ . Each haplotype in the half-sized panel, along with the haplotype  
242 with which it was paired, was then included in the diploid panel. In the event that both  
243 haplotypes of a diploid genome were in the half-sized panel, they were each only chosen once.  
244 If the diploid panel was not fully filled at the end of this process, then haplotype pairs were  
245 randomly taken from the previously unselected diploid genomes until the requisite panel size  
246 of  $k/2$  diploid genomes was reached.

247 For comparison, for each of the 50 data sets, we also generated 1000 random reference panels  
248 by sampling, without replacement,  $k = 200$  of the original  $n = 2000$  haplotypes, giving a  
249 total of 1004 reference panels. A diagram of the simulation pipeline appears in FIGURE 2.

250 For each of the  $k$  haplotypes in a reference panel, we unmasked the genotypes at the  $q - s$   
251 masked sites and used the resulting full sequences as a reference to perform imputation, under  
252 the assumption that the haplotypes represent sequences with resolved phasing. Following  
253 ZHANG *et al.* (2013), to avoid edge effects and to improve imputation accuracy, within each  
254 1Mb haplotype, we imputed only the middle 100kb segment, while still retaining the markers  
255 in both 450kb flanking regions (LI *et al.* 2010). Similar to ZHANG *et al.* (2013), we used  
256 the program `minimac` (HOWIE *et al.* 2012) to perform imputation. The parameter values  
257 entered into `minimac` were as follows: `--rounds = 5` and `--states = 200`.

258 For each choice of reference panel, we evaluated imputation accuracy at the  $r$  imputed sites  
259 (masked sites within the middle 100kb segment) over the  $n/2$  diploid genomes, applying  
260 a discordance metric. At imputed site  $j$  in diploid genome  $i$ , we define  $g_{ij}$  and  $\hat{g}_{ij}$  to be  
261 the true and imputed genotypes respectively. Both  $g_{ij}$  and  $\hat{g}_{ij}$  take on values in  $\{0, 1, 2\}$ ,

262 corresponding to the number of copies of an arbitrarily chosen allele at that specific site.

263 The discordance rate  $D$  across all sites is given by

$$D = \frac{\sum_{i=1}^{n/2} \sum_{j=1}^r |g_{ij} - \hat{g}_{ij}|}{nr}.$$

264 We also compute the discordance rate  $H$  across all true heterozygous genotypes ( $g_{ij} = 1$ ):

$$H = \frac{\sum_{i=1}^{n/2} \sum_{j=1}^r \mathbf{1}_{g_{ij}=1} |g_{ij} - \hat{g}_{ij}|}{2 \sum_{i=1}^{n/2} \sum_{j=1}^r \mathbf{1}_{g_{ij}=1}}.$$

265 In addition, based on the MAF values of their constituent alleles, as computed in the full set

266 of 2000 haplotypes, we further split the true heterozygous sites into three mutually exclusive

267 MAF bins:  $0 < \text{MAF} < 0.1$  (low),  $0.1 \leq \text{MAF} < 0.2$  (medium), and  $0.2 \leq \text{MAF} \leq 0.5$  (high).

268 This separation was performed in order to evaluate how the PD and ADCL algorithms

269 perform across the spectrum of rare to common variants. Note also that the calculations of

270  $D$  and  $H$  sum over all  $n/2$  diploid genomes, irrespective whether they have one, both, or

271 neither of their haplotypes represented in the reference panel.

## 272 **1000 Genomes Project sequence data**

273 We also applied both the PD and ADCL algorithms to sequence data from the 1000

274 Genomes Project, available at [http://csg.sph.umich.edu/abecasis/MACH/download/](http://csg.sph.umich.edu/abecasis/MACH/download/1000G-PhaseI-Interim.html)

275 [1000G-PhaseI-Interim.html](http://csg.sph.umich.edu/abecasis/MACH/download/1000G-PhaseI-Interim.html). Following ZHANG *et al.* (2013), we considered  $n = 762$

276 phased haplotypes from 381 diploid individuals with European ancestry: 87 Utah residents

277 with Northern and Western European ancestry, 93 Finnish from Finland, 89 British from

278 England and Scotland, 14 Iberians from Spain, and 98 Toscani from Italy.

279 We first removed all singleton sites from the data, and we then selected 30 1Mb segments  
280 that were approximately evenly spaced across chromosome 20, avoiding the centromere,  
281 telomeres, and adjacent areas. Study samples were then created using a similar procedure  
282 to that employed for the simulated data. For each of the 30 segments, we randomly selected  
283  $s = 400$  markers with  $MAF > 0.1$  in the full set of 762 haplotypes, and masked the genotypes  
284 of the remaining sites. We then chose  $k = 120$  haplotypes to include in the maximum-PD  
285 and minimum-ADCL reference panels, as well as in 1000 randomly-generated panels. For  
286 each choice of reference panel used for each segment, we imputed the middle 100kb, retaining  
287 the markers in both 450kb flanking regions. We then evaluated  $D$  and  $H$  analogously to the  
288 experiments with the simulated data.

## 289 RESULTS

### 290 **Stability of the adapted PAM algorithm**

291 Before considering the actual imputation results produced by the different algorithms for  
292 reference panel selection, we empirically validated the stability of the adapted PAM algorithm  
293 in choosing the minimum-ADCL panel. Beyond the initial run for each of our 50 simulated  
294 data sets, we repeated the selection of the minimum-ADCL panel five additional times. For  
295 each repetition, we executed the adapted PAM algorithm with a different starting seed, and  
296 then determined the number of haplotypes that were shared by the minimum-ADCL panels  
297 from both the initial run and the run with the modified seed.

298 When comparing two panels of 200 reference haplotypes drawn from a set of 2000 sample  
299 haplotypes, let  $m$  be the number of haplotypes that are shared by both panels ( $0 \leq m \leq$   
300  $200$ ). For each of the five replicates, we calculated the mean value of  $m$  across the 50  
301 data sets, comparing each replicate to the initial run. All five mean values of  $m$  were

302 observed to be  $\sim 179$  (TABLE 1); for comparison, the mean of the hypergeometric distribution  
303 describing the number of haplotypes shared between two panels of size 200 independently  
304 drawn from a pool of 2000 is 20, with standard deviation 4.03. Therefore, despite changing  
305 the specific haplotypes used in randomly initializing the adapted PAM algorithm, most  
306 haplotypes eventually chosen for inclusion in the minimum-ADCL panel remain the same.  
307 This result suggests that the adapted PAM algorithm is in fact stable, and in subsequent  
308 analysis, we consider only a single starting seed.

### 309 **Polymorphic sites in reference panels**

310 For each of the 1004 reference panels, we evaluated the number of masked sites within the  
311 imputed 100kb segment that were polymorphic. This calculation is important because only  
312 sites that are polymorphic in the reference panel can produce a meaningful imputation result  
313 for the remainder of the study sample. Summing across all 50 data sets, we detected a total  
314 of 12,851 masked sites within the 100kb segment of interest. We then compared how many of  
315 those masked sites appear as polymorphic in the maximum-PD panel, the minimum-ADCL  
316 panel, and a single random panel.

317 Of the 12,851 masked sites, 8879 sites (69.09%) were polymorphic in all three reference-panel  
318 types. Of the 3972 remaining sites, 1138 (8.86%) were polymorphic in both the maximum-PD  
319 and minimum-ADCL panels, 244 (1.90%) were polymorphic in both the maximum-PD and  
320 random panels, and 374 (2.91%) were polymorphic in both the minimum-ADCL and random  
321 panels. In addition, 464 (3.61%), 473 (3.68%), and 391 (3.04%) sites were polymorphic in  
322 only the maximum-PD, minimum-ADCL, and random panels, respectively. Finally, 888  
323 (6.91%) of the masked sites were monomorphic in all three panels (FIGURE 3).

324 Overall, 10,725 sites (83.46%) were polymorphic in the 50 maximum-PD panels, 10,864 sites  
325 (84.54%) were polymorphic in the 50 minimum-ADCL panels, and 9888 sites (76.94%) were

326 polymorphic in the 50 random panels. Using the two-tailed Wilcoxon signed-rank test, we  
327 found that both the maximum-PD and minimum-ADCL methods of panel selection identify  
328 substantially more polymorphic sites compared to choosing the reference panel randomly  
329 ( $P = 7.686 \times 10^{-10}$  and  $P = 8.175 \times 10^{-10}$ , respectively).

### 330 **Polymorphic sites in imputed data sets**

331 The maximum-PD and minimum-ADCL selection algorithms result in similar numbers of  
332 polymorphic sites as a fraction of the total number of masked sites in their respective ref-  
333 erence panels. We next evaluated the number of imputed sites the two methods recovered  
334 as polymorphic. In each of the 50 simulated data sets, we calculated the percentage of  
335 masked sites that were polymorphic in the imputed sample, using the maximum-PD panel,  
336 the minimum-ADCL panel, the diploid PD panel, the diploid ADCL panel, and the same  
337 random panel used to assess the number of polymorphic sites within the reference panels.

338 FIGURE 4 compares the proportion of polymorphic sites imputed with combinations of the  
339 five reference panel types. In each panel of FIGURE 4, the random panel is used as a baseline  
340 for evaluating two of the other four panel selection methods.

341 We used the two-tailed Wilcoxon signed-rank test to evaluate differences in the fraction  
342 of sites identified as polymorphic by the different panel types. Both the maximum-PD  
343 and minimum-ADCL panels recover a significantly larger percentage of polymorphic sites  
344 compared with their respective diploid panels ( $P = 3.448 \times 10^{-9}$  and  $P = 2.309 \times 10^{-9}$ ,  
345 respectively). The minimum-ADCL panel also outperforms the maximum-PD panel ( $P =$   
346  $4.944 \times 10^{-4}$ ). However, the percentage of imputed sites that are polymorphic shows no  
347 significant difference when comparing the diploid PD and diploid ADCL panels ( $P = 0.1625$ ).



## 348 **Discordance rates**

349 As a measure of imputation accuracy, for each of the 50 simulated data sets, we separately  
350 calculated the discordance rate  $D$  across all sites that were imputed with the maximum-PD  
351 panel, the minimum-ADCL panel, the diploid PD panel, and the diploid ADCL panel. For a  
352 baseline, we also calculated the mean discordance rate over the 1000 randomly-selected refer-  
353 ence panels. We are mainly interested in comparing the performance between the maximum-  
354 PD and minimum-ADCL panels, as well as between the diploid PD and diploid ADCL panels.

355 The discordance rates appear in FIGURE 5, and their mean values are summarized in TABLE  
356 2. Again using the two-tailed Wilcoxon signed-rank test, the minimum-ADCL panel exhibits  
357 significantly lower discordance rates than the maximum-PD panel ( $P = 1.342 \times 10^{-9}$ ).  
358 The diploid ADCL panel also has lower discordance rates than the diploid PD panel ( $P =$   
359  $2.597 \times 10^{-3}$ ). The minimum-ADCL, maximum-PD, diploid ADCL, and diploid PD panels  
360 all provide lower discordance rates than the mean of the 1000 randomly-selected panels  
361 ( $P = 7.789 \times 10^{-10}$ ,  $9.928 \times 10^{-10}$ ,  $8.797 \times 10^{-10}$ , and  $4.920 \times 10^{-7}$ , respectively).

362 To generate a discordance measure for low-frequency variants, we also calculated the dis-  
363 cordance rate  $H$  across the heterozygous sites with  $0 < \text{MAF} < 0.1$ . From FIGURE 5  
364 and TABLE 2, we observe that the mean discordance rates are higher for low-MAF loci  
365 than they are for high-MAF loci. Nevertheless, compared to the maximum-PD panel, the  
366 minimum-ADCL panel still achieves significantly higher imputation accuracy on low-MAF  
367 heterozygotes ( $P = 1.606 \times 10^{-9}$ ). The same relationship also holds between the diploid  
368 ADCL and diploid PD panels ( $P = 1.871 \times 10^{-4}$ ). As was observed when considering  
369 all variants, the minimum-ADCL, maximum-PD, diploid ADCL, and diploid PD panels all  
370 have lower discordance rates than the mean of the 1000 random panels ( $P = 7.790 \times 10^{-10}$ ,  
371  $1.264 \times 10^{-9}$ ,  $7.790 \times 10^{-10}$ , and  $2.244 \times 10^{-6}$ , respectively).

## 372 **Discordance rates under different simulation settings**

373 Following ZHANG *et al.* (2013), to investigate how different parameter choices might have  
374 affected the simulation results, we repeated the analysis taking into consideration (i) different  
375 reference panel sizes  $k$ , (ii) different marker densities  $s$ , and (iii) different target sequence  
376 lengths. When varying a parameter, we kept the other two parameters constant at their  
377 default values used in the initial analysis (reference panel size  $k = 200$ , number of markers  
378 per MB  $s = 300$ , imputation length = 100kb). The baseline for comparison here is the  
379 mean discordance rate over the 50 randomly-selected reference panels. Owing to runtime  
380 considerations, this number is smaller than the 1000 randomly-selected reference panels used  
381 to calculate the baseline mean discordance rate in the initial analysis. Box plots of the results  
382 are shown in FIGURE 6, and mean discordance rates of the various panel types over all sites  
383 and over the low-frequency variants appear in TABLES 3 and 4, respectively.

384 We first evaluated the influence of reference panel size on imputation accuracy, considering  
385 cases with  $k$  equal to 100, 300, 400, and 500 (compared to the initial analysis with  $k = 200$ ).  
386 We observe that as the panel size  $k$  increases, discordance rates decrease across all reference  
387 panel types. However, we also note a decrease in the difference in performance between the  
388 ADCL and PD algorithms, in both the haploid (“maximum-PD” and “minimum-ADCL”)  
389 and diploid cases. In other words, the gain in imputation accuracy obtained by minimizing  
390 ADCL instead of maximizing PD diminishes with large reference panel sizes.

391 Next, we examined how the initial genotyping density of the markers affected imputation  
392 accuracy by considering instances with  $s$  equal to 200, 400, 500, and 600 (compared to  
393 the initial choice of  $s = 300$ ). Here, across all reference panel types, the discordance rates  
394 decrease slightly with increasing marker density  $s$ . Nevertheless, for all densities, both the  
395 haploid and diploid ADCL panels consistently outperform their PD counterparts in terms  
396 of imputation accuracy across all sites, as well as across only the low-frequency variants.

397 Finally, we considered whether the length of the target imputation region has an effect on  
398 imputation accuracy. We imputed segments of length 500kb, 1Mb and 2Mb (compared to  
399 the initial imputation length choice of 100kb). In all cases, a flanking 450kb region was added  
400 to each end of the sequence in order to avoid edge effects. We observe that discordance rates  
401 remain relatively constant across different imputation lengths. Again, the ADCL panels  
402 produce significantly lower discordance rates compared to the PD panels, regardless of the  
403 specific choice of imputation length.

#### 404 **Discordance rates with 1000 Genomes Project sequence data**

405 To confirm that our findings on the simulated data set are also observed when using actual se-  
406 quence data, we performed a similar analysis for 30 1Mb segments generated on chromosome  
407 20, using 381 diploid individuals with European ancestry from the 1000 Genomes Project.  
408 We are again interested in comparing the difference in imputation accuracy achieved by  
409 the minimum-ADCL and maximum-PD panels, using the mean discordance rate over 1000  
410 randomly-selected reference panels as a baseline for comparison. The discordance rates ap-  
411 pear in FIGURE 7, and their mean values are summarized in TABLE 5. For the three different  
412 panel types, FIGURE 8 compares the discordance rates examined in each of the 30 segments  
413 over all imputed sites, as well as over only the low-frequency variants.

414 Applying the two-tailed Wilcoxon signed-rank test, we observe that across all imputed  
415 sites, the minimum-ADCL algorithm produces significantly lower discordance rates than  
416 the maximum-PD algorithm ( $P = 2.367 \times 10^{-3}$ ), as shown in TABLE 5. In addition, when  
417 focusing solely on the low-frequency variants, the minimum-ADCL panel continues to pro-  
418 duce better imputation accuracy than the maximum-PD panel ( $P = 0.0234$ ).

419

## DISCUSSION

420 The decreasing cost of modern sequencing has enhanced the practicality of generating a  
421 reference panel from the haplotypes that are already present in the study sample. It generally  
422 remains prohibitive, however, to perform full sequencing for large numbers of haplotypes.  
423 Given this constraint in resources, what is the optimal approach for selecting the subset of  
424 the study sample to sequence in order to achieve the best imputation results? We explored  
425 two objective functions for optimization, with the aim of ensuring high imputation accuracy.

426 Maximizing PD as a way of ensuring that the total genetic diversity of a sample is well-  
427 represented is one sensible approach. This type of panel selection method achieves lower  
428 imputation discordance rates than assembling reference panels from randomly-selected hap-  
429 lotypes (KANG AND MARJORAM 2012; ZHANG *et al.* 2013). Nevertheless, it has not been  
430 clear whether PD represents the best objective function for panel selection.

431 Minimizing ADCL attempts to ensure that the subset of the study sample selected for the  
432 panel is representative of the total diversity present, albeit using a different approach. It  
433 is conceptually similar to a clustering problem, in that the number of clusters is predeter-  
434 mined, and the algorithm returns the cluster to which each haplotype belongs, as well as the  
435 haplotype that is the most central within its cluster. This haplotype is then included in the  
436 reference panel. Unlike when maximizing PD, the problem of selecting non-representative  
437 branches is mostly avoided by ADCL, as those haplotypes are unlikely to occupy a central  
438 position within their clusters.

439 For both simulated and actual sequence data, we observed that minimizing ADCL does in fact  
440 provide an improvement in imputation accuracy compared to maximizing PD. It generally  
441 identified a greater number of polymorphic sites, both in the reference panels as well as  
442 in the imputed data. When looking at the overall discordance-rate measures, minimizing

443 ADCL produces a significantly lower discordance rate over all sites compared to maximizing  
444 PD. This result holds across various choices of genotyping density and imputation length,  
445 suggesting that the observed result is robust to such changes. It is only with increasing  
446 panel sizes that the gain in imputation accuracy obtained by minimizing ADCL decreases  
447 compared to maximizing PD. This outcome could potentially be due to the diminishing  
448 returns, in terms of representative variants, contributed by each additional haplotype in the  
449 reference panel. Consider the extreme case, where all the haplotypes in the study sample  
450 are included in the reference panel. In such a situation, both algorithms return trivially  
451 identical imputation results.

452 One metric that is of particular interest is the performance of an algorithm in the imputation  
453 of low-frequency variants. Although early genome-wide association (GWA) studies focused  
454 on identifying common variants associated with particular diseases or phenotypic traits, the  
455 focus of GWA studies has increasingly shifted toward an interest in rare genetic variants  
456 (ASIMIT AND ZEGGINI 2010; CIRULLI AND GOLDSTEIN 2010; EICHLER *et al.* 2010). As  
457 such studies improve in their ability to detect the effects of rare variants on phenotype (LI *et*  
458 *al.* 2013; LEE *et al.* 2014), it is paramount that the imputation process carried out alongside  
459 them generate reasonably accurate imputed genotypes with low-frequency variants.

460 In this context, from TABLES 2 and 5, we observed, based on differences in the mean  
461 discordance rates, that minimizing ADCL improves upon maximizing PD by the largest  
462 absolute amount in the low-MAF bin ( $0 < \text{MAF} < 0.1$ ), in both the simulated and the actual  
463 data. This result might be explained by the fact that the discordance rates obtained when  
464 imputing low-frequency variants are relatively high to begin with, and can be potentially  
465 reduced to a much greater extent with an improved choice of algorithm for panel selection.  
466 Our analyses are consistent in suggesting that the minimum-ADCL algorithm can contribute  
467 to reducing imputation inaccuracies in GWA studies that seek to identify the effects of low-  
468 frequency variants on phenotypic traits.

469 In summary, we have demonstrated that internal reference panel selection via minimizing  
470 ADCL produces empirically improved imputation accuracy compared to maximizing PD,  
471 particularly for low-frequency variants. This finding applies to both simulated and actual  
472 sequence data, and is robust to changes in the choice of initial parameter values. Note  
473 that both ADCL and PD represent intermediate criteria that provide practical objective  
474 functions, where the ultimate goal is maximizing imputation accuracy or other aspects of  
475 imputation performance. Although both algorithms produce considerably better imputation  
476 performance measures than the use of random panels, neither is guaranteed to produce the  
477 maximal value of such measures over all possible panels. It remains to be determined whether  
478 a single simple criterion exists that could lead to identification of the best possible panel for  
479 maximizing imputation performance.

480

## ACKNOWLEDGMENTS

481 This work was supported by National Institutes of Health grant R01 HG005855.

482

## LITERATURE CITED

483 Asimit J., and E. Zeggini, 2010. Rare variant association analysis methods for complex  
484 traits. *Annu. Rev. Genet.* **44**: 293–308.

485 Bordewich M., A. G. Rodrigo, and C. Semple, 2008. Selecting a taxa to save or sequence:  
486 desirable criteria and a greedy solution. *Syst. Biol.* **57**: 825–834.

487 Cirulli E. T., and D. B. Goldstein, 2010. Uncovering the roles of rare variants in common  
488 disease through whole-genome sequencing. *Nat. Rev. Genet.* **11**: 415–425.

489 Eichler E. E., J. Flint, G. Gibson, A. Kong, S. M. Leal *et al.*, 2010. Missing heritability  
490 and strategies for finding the underlying causes of complex disease. *Nat. Rev. Genet.* **11**:  
491 446–450.

492 Faith D. P., 1992. Conservation evaluation and phylogenetic diversity. *Biol. Conserv.* **61**:  
493 1–10.

494 Fridley B. L., G. Jenkins, M. E. Deyo-Svendsen, S. Hebring, and R. Freimuth, 2010. Uti-  
495 lizing genotype imputation for the augmentation of sequence data. *PLoS ONE* **5**: e11018.

496 Hartmann K., and M. Steel, 2007. Phylogenetic diversity: from combinatorics to ecology,  
497 pp. 171–196 in *Reconstructing Evolution: New Mathematical and Computational Advances*,  
498 edited by O. Gascuel, and M. Steel. Oxford University Press, Oxford.

499 Howie, B., C. Fuchsberger, M. Stephens, J. Marchini, and G. R. Abecasis, 2012. Fast  
500 and accurate genotype imputation in genome-wide association studies through pre-phasing.  
501 *Nat. Genet.* **44**: 955–959.

502 Huang, L., Y. Li, A. B. Singleton, J. A. Hardy, G. Abecasis *et al.*, 2009. Genotype-imputation  
503 accuracy across worldwide human populations. *Am. J. Hum. Genet.* **84**: 235–250.

504 Huang, L., M. Jakobsson, T. J. Pemberton, M. Ibrahim, T. Nyambo *et al.*, 2011. Haplotype  
505 variation and genotype imputation in African populations. *Genet. Epidemiol.* **35**: 766–780.

506 Hudson, R. R., 2002. Generating samples under a Wright-Fisher neutral model of genetic  
507 variation. *Bioinformatics* **18**: 337–338.

508 International HapMap Consortium, 2005. A haplotype map of the human genome. *Nature*  
509 **437**: 1299–1320.

- 510 Jewett, E. M., M. Zawistowski, N. A. Rosenberg, and S. Zöllner, 2012. A coalescent model  
511 for genotype imputation. *Genetics* **191**: 1239–1255.
- 512 Kang, C. J., and P. Marjoram, 2012. A sample selection strategy for next-generation se-  
513 quencing. *Genet. Epidemiol.* **36**: 696–709.
- 514 Kaufman, L., and P. J. Rousseeuw, 1987. Clustering by means of medoids, pp. 405–416 in  
515 *Statistical Data Analysis Based on the L1-Norm and Related Methods*, edited by Y. Dodge.  
516 North-Holland, Amsterdam.
- 517 Kreiner-Møller, E., C. Medina-Gomez, A. G. Uitterlinden, F. Rivadeneira, and K. Estrada,  
518 2015. Improving accuracy of rare variant imputation with a two-step imputation approach.  
519 *Eur. J. Hum. Genet.* **23**: 395–400.
- 520 Lee, S., G. R. Abecasis, M. Boehnke, and X. Lin, 2014. Rare-variant association analysis:  
521 study designs and statistical tests. *Am. J. Hum. Genet.* **95**: 5–23.
- 522 Li, B., D. J. Liu, and S. M. Leal, 2013. Identifying rare variants associated with complex  
523 traits via sequencing. *Curr. Protoc. Hum. Genet.* **78**: 1.26.1–1.26.22.
- 524 Li, Y., C. Willer, S. Sanna, and G. Abecasis, 2009. Genotype imputation. *Annu. Rev. Ge-*  
525 *nomics Hum. Genet.* **10**: 387–406.
- 526 Li, Y., C. J. Willer, J. Ding, P. Scheet, and G. R. Abecasis, 2010. MaCH: using sequence  
527 and genotype data to estimate haplotypes and unobserved genotypes. *Genet. Epidemiol.* **34**:  
528 816–834.
- 529 Marchini, J., and B. Howie, 2010. Genotype imputation for genome-wide association studies.  
530 *Nat. Rev. Genet.* **11**: 499–511.



- 531 Matsen, F. A., A. Gallagher, and C. O. McCoy, 2013. Minimizing the average distance to a  
532 closest leaf in a phylogenetic tree. *Syst. Biol.* **62**: 824–836.
- 533 Pardi, F., and N. Goldman, 2005. Species choice for comparative genomics: being greedy  
534 works. *PLoS Genet.* **1**: e71.
- 535 Paşaniuc, B., R. Avinery, T. Gur, C. F. Skibola, P. M. Bracci *et al.*, 2010. A generic  
536 coalescent-based framework for the selection of a reference panel for imputation. *Genet. Epi-*  
537 *demiol.* **34**: 773–782.
- 538 Peil, B., M. Kabisch, C. Fischer, U. Hamann, and J. L. Bermejo, 2015. Tailored selection of  
539 study individuals to be sequenced in order to improve the accuracy of genotype imputation.  
540 *Genet. Epidemiol.* **39**: 114–121.
- 541 Saitou, N., and M. Nei, 1987. The neighbor-joining method: a new method for reconstructing  
542 phylogenetic trees. *Mol. Biol. Evol.* **4**: 406–425.
- 543 Sampson J. N., K. Jacobs, Z. Wang, M. Yeager, S. Chanock *et al.*, 2012. A two-platform  
544 design for next generation genome-wide association studies. *Genet. Epidemiol.* **36**: 400–408.
- 545 Sheng, W., and X. Liu, 2004. A hybrid algorithm for  $k$ -medoid clustering of large data sets.  
546 *Proc. IEEE Congr. Evol. Comput.* **1**: 77–82.
- 547 Shriner, D., and A. Adeyemo, G. Chen, C. N. Rotimi, 2010. Practical considerations for  
548 imputation of untyped markers in admixed populations. *Genet. Epidemiol.* **34**: 258–265.
- 549 Simonsen, M., T. Mailund, and C. N. S. Pedersen, 2008. Rapid neighbor-joining, pp. 113–  
550 122 in *Algorithms in Bioinformatics*, edited by K. A. Crandall, and J. Lagergren. Springer-  
551 Verlag, Berlin.
- 552 Steel, M., 2005. Phylogenetic diversity and the greedy algorithm. *Syst. Biol.* **54**: 527–529.

- 553 Sukumaran, J., and M. T. Holder, 2010. DendroPy: A Python library for phylogenetic  
554 computing. *Bioinformatics* **26**: 1569–1571.
- 555 Surakka, I., K. Kristiansson, V. Anttila, M. Inouye, C. Barnes *et al.*, 2010. Founder  
556 population-specific HapMap panel increases power in GWA studies through improved impu-  
557 tation accuracy and CNV tagging. *Genome Res.* **20**: 1344–1351.
- 558 The 1000 Genomes Project Consortium, 2010. A map of human genome variation from  
559 population-scale sequencing. *Nature* **467**: 1061–1073.
- 560 Theodoridis, S., and K. Koutroumbas, 2008. *Pattern Recognition* (4th ed.). Academic Press,  
561 Waltham, MA.
- 562 Zhang, P., X. Zhan, N. A. Rosenberg, and S. Zöllner, 2013. Genotype imputation reference  
563 panel selection using maximal phylogenetic diversity. *Genetics* **195**: 319–330.

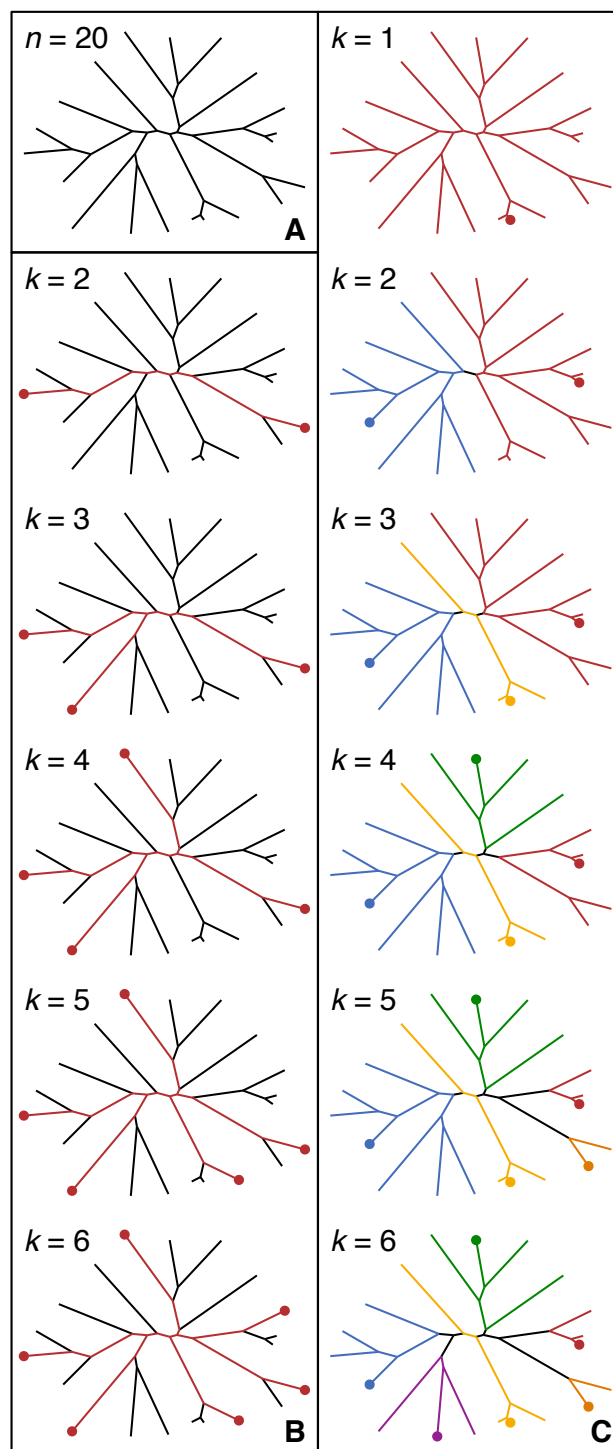

FIGURE 1: Reference panels for an example tree with  $n = 20$  haplotypes. (A) An example tree. (B) The maximum-PD panel. (C) The minimum-ADCL panel. In (B) and (C), the haplotypes selected for a given panel size  $k$  are represented by a dot at the tips. In (C), each selected haplotype is assigned a color, and all other branches share a color with the closest selected haplotype.

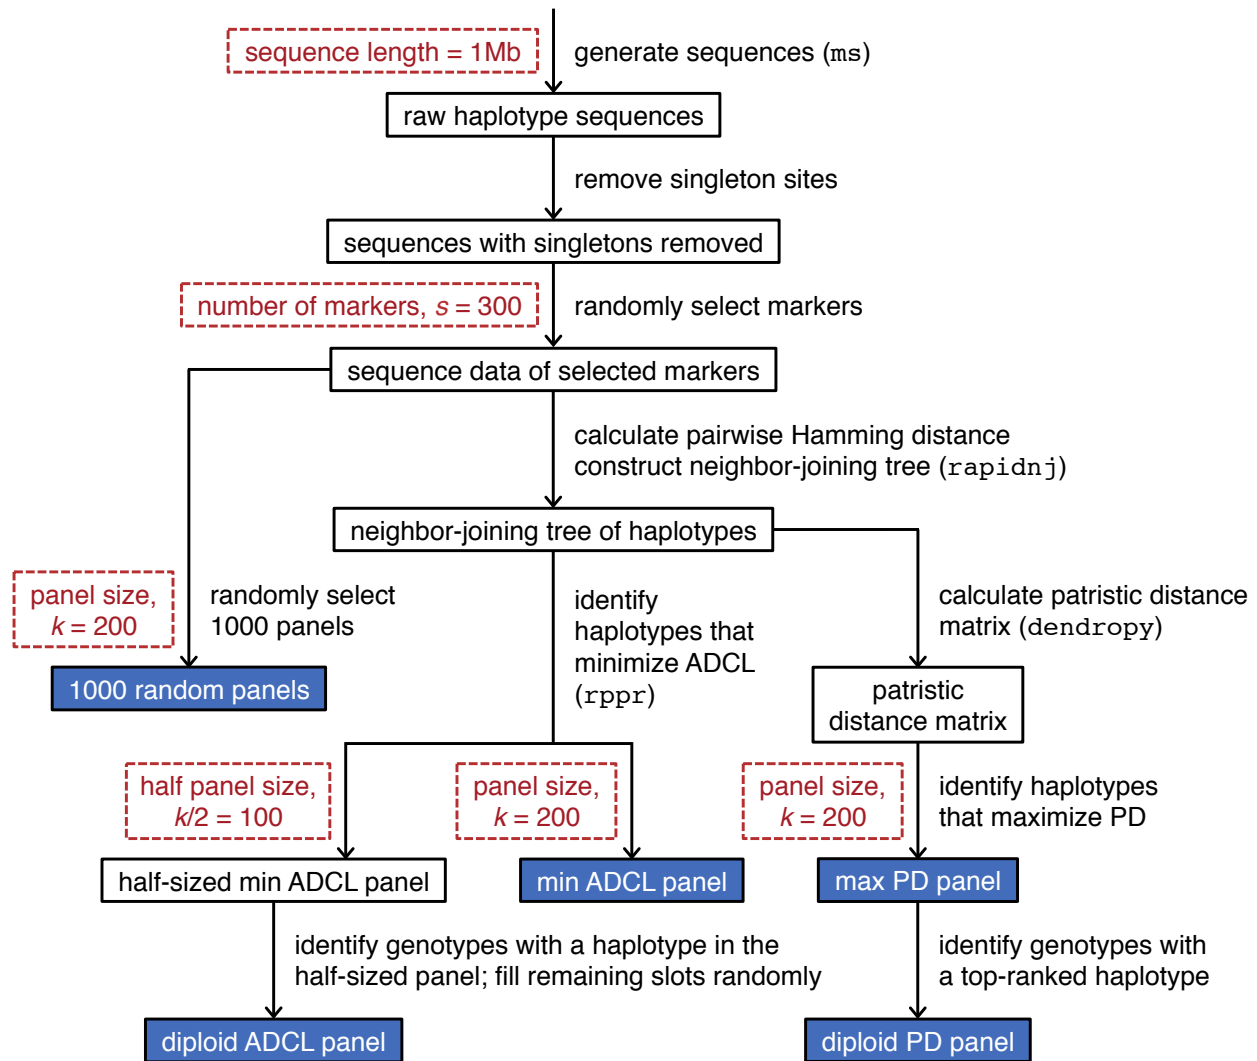

FIGURE 2: A schematic diagram of the pipeline used to generate the simulated data. The red boxes each represent a parameter choice, and the blue boxes represent the 1004 reference panels used in our evaluation.

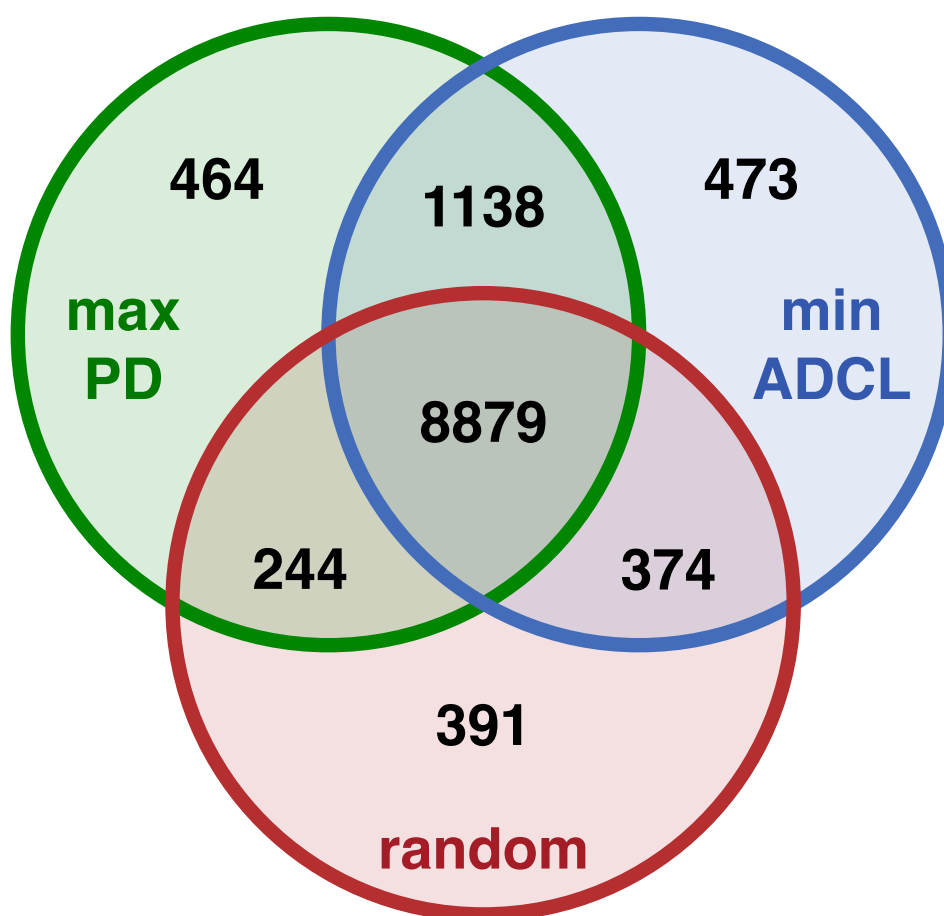

FIGURE 3: A Venn diagram showing the number of polymorphic sites returned by each panel type, out of a total of 12,851 masked sites. 888 sites were monomorphic in all three panels.

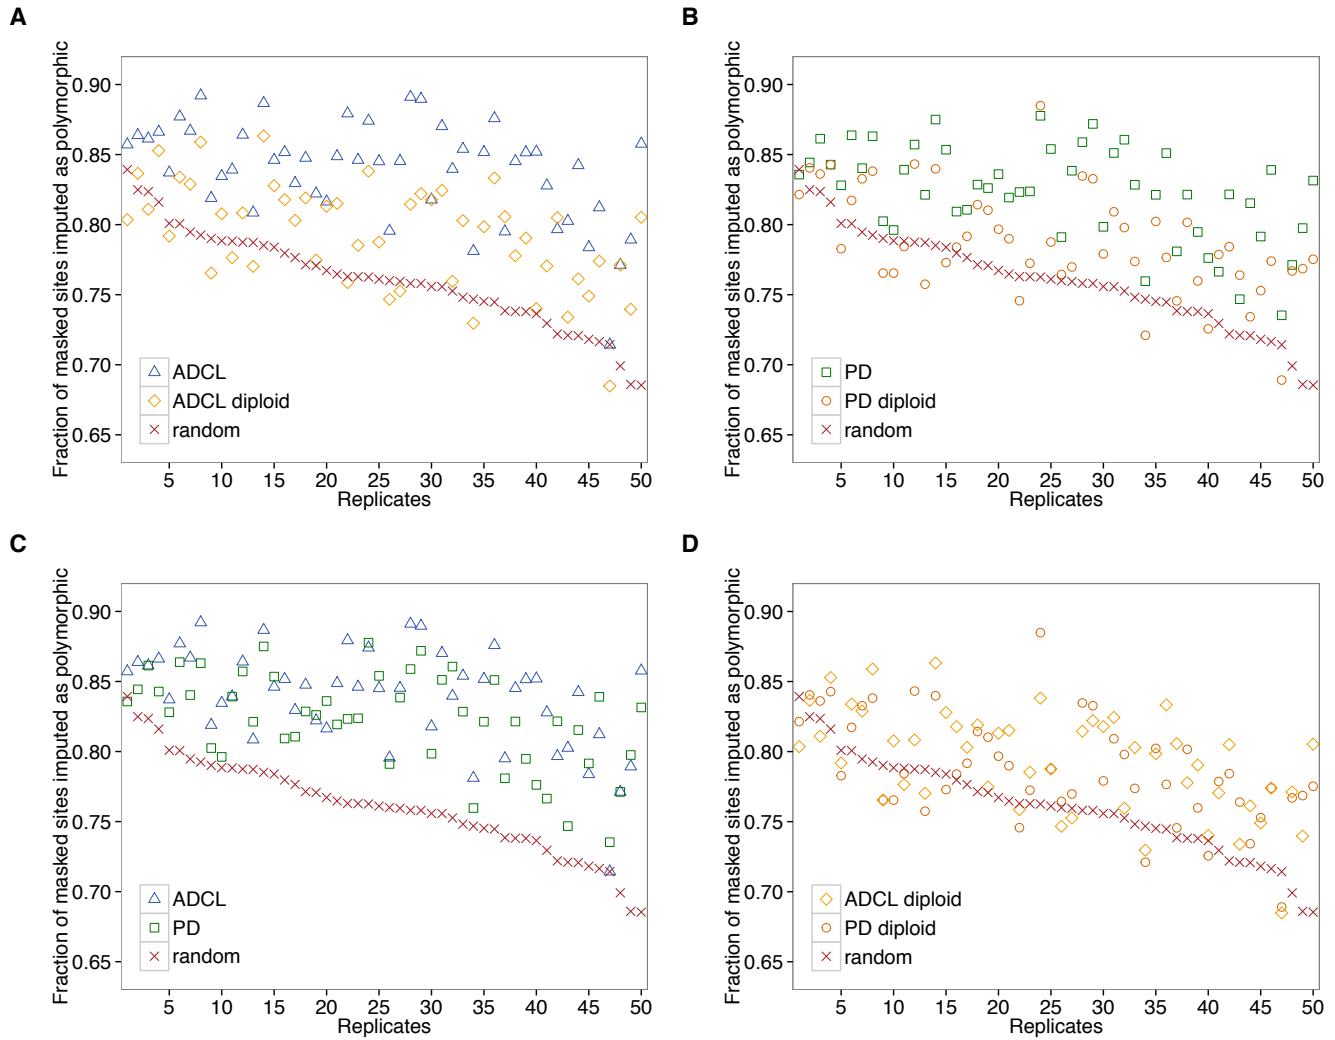

FIGURE 4: Fraction of masked sites imputed as polymorphic, using five different types of reference panels. Data are split into various graphs for ease of comparison. (A) ADCL versus ADCL diploid. (B) PD versus PD diploid. (C) ADCL versus PD. (D) ADCL diploid versus PD diploid. The 50 replicate data sets are sorted in decreasing order by the percentage of polymorphic sites recovered by imputations using the random reference panel.

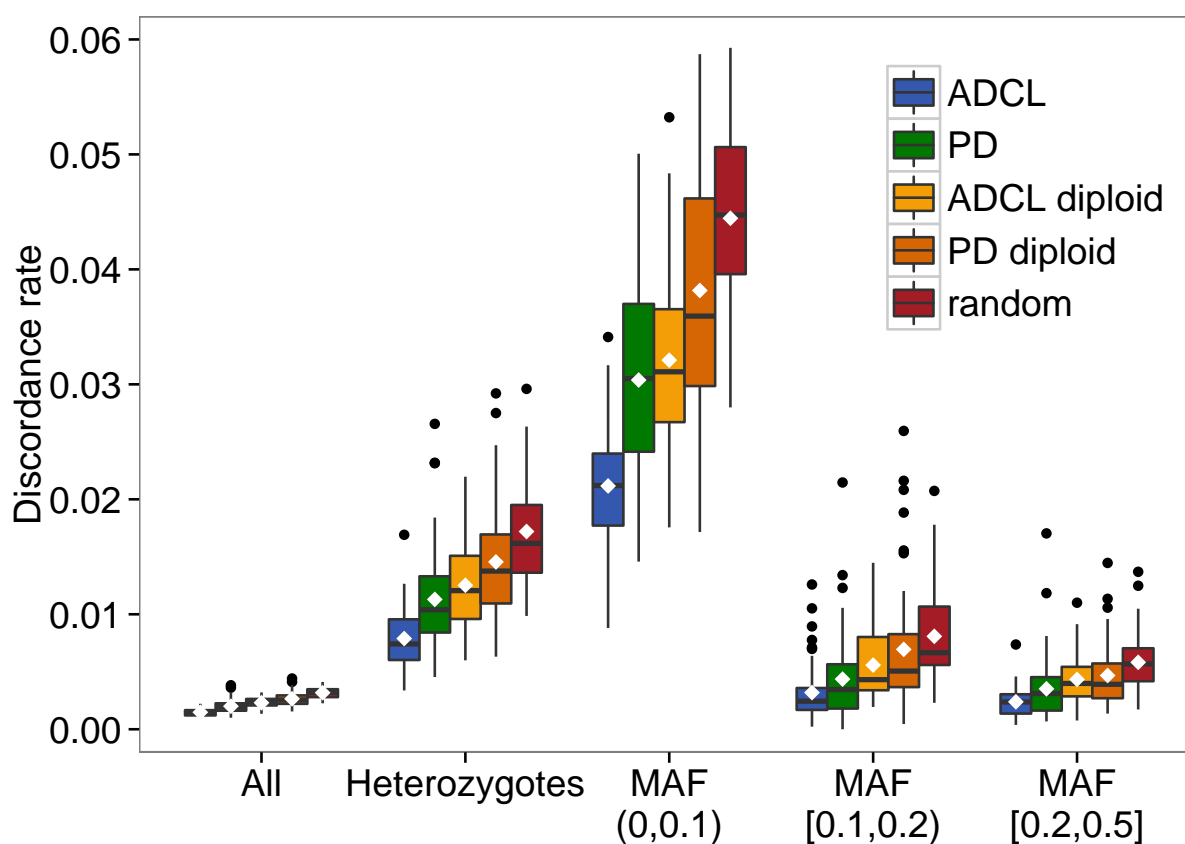

FIGURE 5: Box plots of discordance rates between imputed and simulated genotypes using the five different reference panel types. The mean discordance rate across the 50 replicates for each comparison group is indicated by a diamond, and the median discordance rate is indicated by a horizontal line. The  $x$ -axis separates the comparison over all sites, all heterozygous sites, and heterozygous sites falling into three different MAF groups.

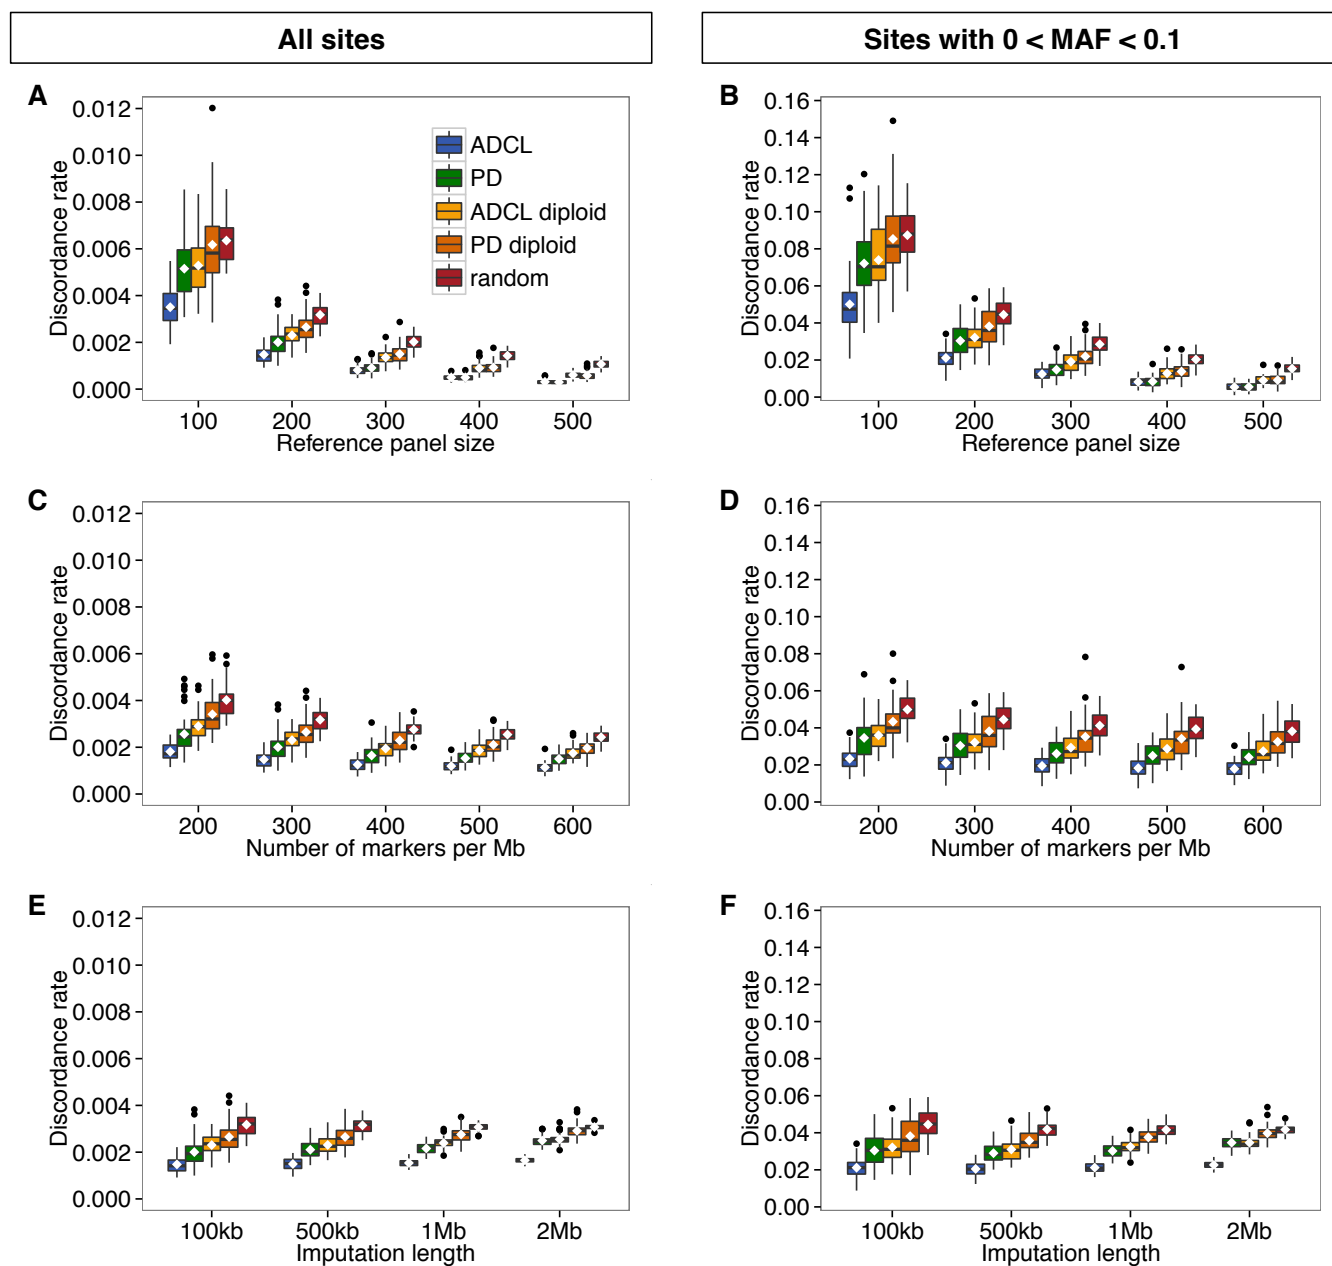

FIGURE 6: Box plots of discordance rates between imputed and simulated genotypes using the five different reference panel types. (A) Varying reference panel size, all sites. (B) Varying reference panel size, heterozygous sites with  $0 < \text{MAF} < 0.1$ . (C) Varying marker density, all sites. (D) Varying marker density, heterozygous sites with  $0 < \text{MAF} < 0.1$ . (E) Varying imputation length, all sites. (F) Varying imputation length, heterozygous sites with  $0 < \text{MAF} < 0.1$ .



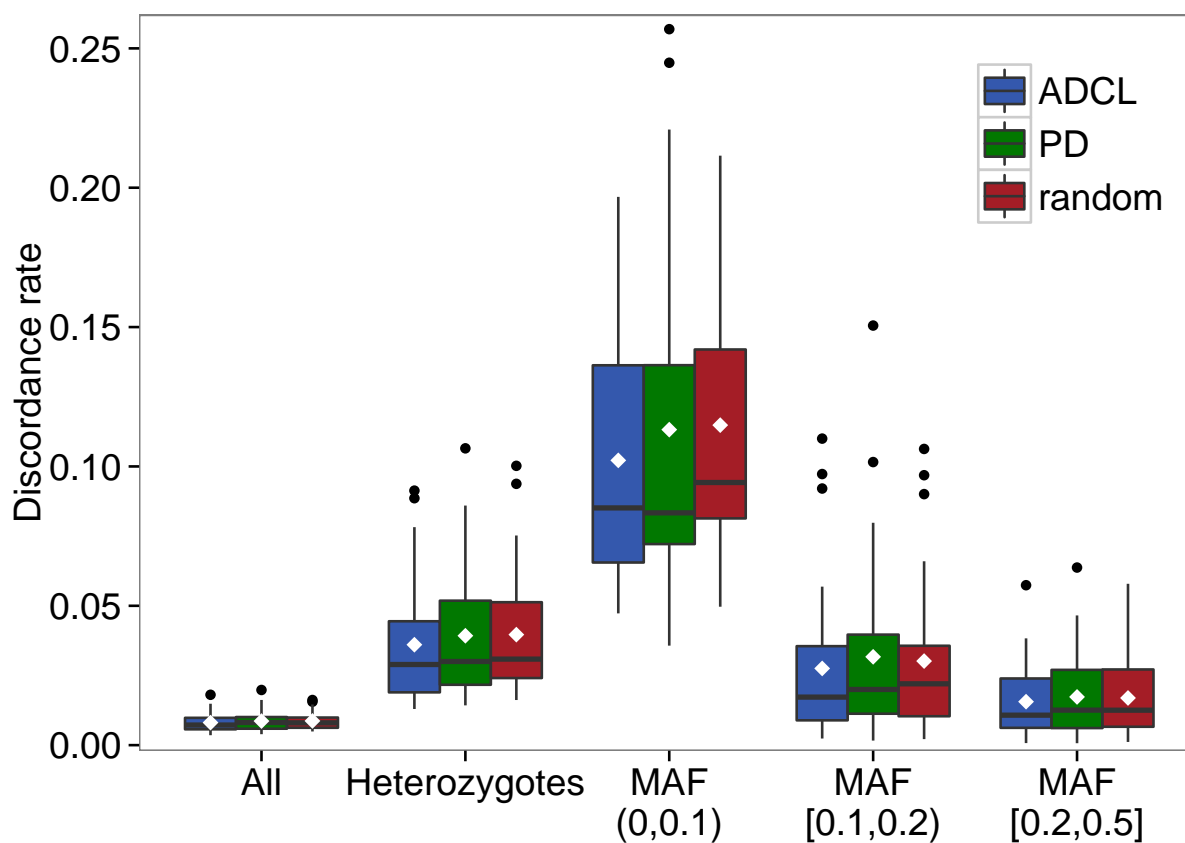

FIGURE 7: Box plots of discordance rates between imputed and actual genotypes using the minimum-ADCL, maximum-PD, and random panels. The data consist of 30 1Mb segments from 762 haplotypes of European ancestry obtained from the 1000 Genomes Project. The mean discordance rate across the 30 replicates for each comparison group is indicated by a diamond, and the median discordance rate is indicated by a horizontal line. The  $x$ -axis separates the comparison over all sites, all heterozygous sites, and heterozygous sites falling into three different MAF groups.

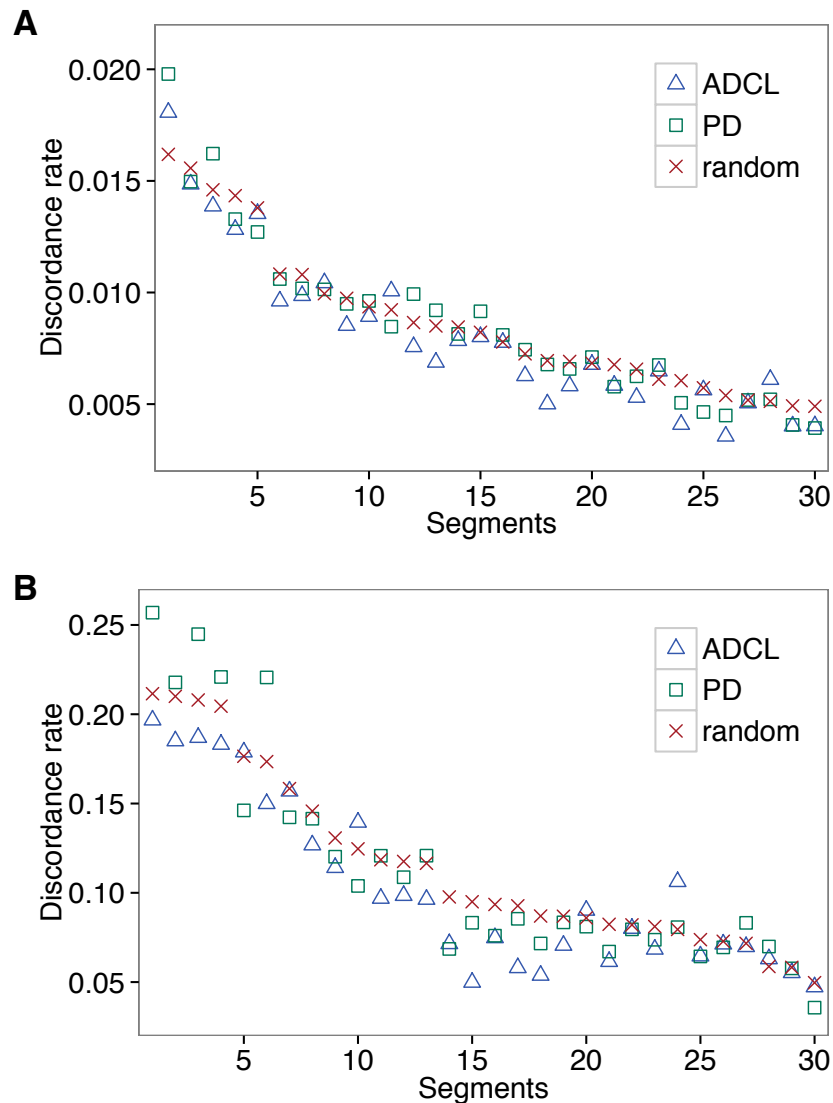

FIGURE 8: Discordance rates between imputed and actual genotypes using the minimum-ADCL, maximum-PD, and random panels, showing an alternative presentation of the same data used to generate FIGURE 7. (A) All sites. (B) Heterozygous sites with  $0 < \text{MAF} < 0.1$ . The 30 segments are sorted in decreasing order by the mean discordance rate over 1000 random panels.

TABLE 1: Mean and standard deviation of the number of shared haplotypes across 50 data sets in each of five replicates

| Replicate | Mean   | Standard deviation |
|-----------|--------|--------------------|
| 1         | 179.40 | 4.1991             |
| 2         | 178.56 | 4.9494             |
| 3         | 179.38 | 4.5888             |
| 4         | 179.00 | 4.7208             |
| 5         | 178.58 | 4.8910             |

For the five replicates, each with a different starting seed, we compared the minimum-ADCL panels from the initial run of the adapted PAM algorithm and the minimum-ADCL panels using the different seed. The table shows the mean (out of 200) and standard deviation of the number of shared haplotypes across the 50 data sets.

TABLE 2: Mean discordance rates between imputed and simulated genotypes, using the maximum (haploid) PD, minimum (haploid) ADCL, diploid PD, and diploid ADCL panels

|                | Haploid panels |          |                        | Diploid panels |          |                        |
|----------------|----------------|----------|------------------------|----------------|----------|------------------------|
|                | PD (%)         | ADCL (%) | <i>P</i> -value        | PD (%)         | ADCL (%) | <i>P</i> -value        |
| All            | 0.2003         | 0.1476   | $1.342 \times 10^{-9}$ | 0.2648         | 0.2304   | $2.597 \times 10^{-3}$ |
| Heterozygotes  | 1.1295         | 0.7888   | $1.921 \times 10^{-9}$ | 1.4554         | 1.2523   | $1.360 \times 10^{-3}$ |
| MAF (0, 0.1)   | 3.0374         | 2.1160   | $1.606 \times 10^{-9}$ | 3.8164         | 3.2103   | $1.871 \times 10^{-4}$ |
| MAF [0.1, 0.2) | 0.4363         | 0.3190   | $2.792 \times 10^{-3}$ | 0.6947         | 0.5582   | 0.0857                 |
| MAF [0.2, 0.5] | 0.3518         | 0.2386   | $2.567 \times 10^{-5}$ | 0.4676         | 0.4335   | 0.4174                 |

This table is obtained from the data in FIGURE 5. The comparison is performed over all sites, all heterozygous sites, and heterozygous sites falling into three different MAF groups. Also shown are the *P*-values of the two-tailed Wilcoxon signed-rank tests comparing the discordance rates of the PD and ADCL reference panels.

TABLE 3: Mean discordance rates between imputed and simulated genotypes for all sites, using the maximum (haploid) PD, minimum (haploid) ADCL, diploid PD, and diploid ADCL panels, under different input parameter choices

|                                    | Haploid panels |               |                                          | Diploid panels |               |                                          |
|------------------------------------|----------------|---------------|------------------------------------------|----------------|---------------|------------------------------------------|
|                                    | PD (%)         | ADCL (%)      | <i>P</i> -value                          | PD (%)         | ADCL (%)      | <i>P</i> -value                          |
| Reference panel size, <i>k</i>     |                |               |                                          |                |               |                                          |
| <i>k</i> = 100                     | 0.5150         | 0.3502        | $5.213 \times 10^{-9}$                   | 0.6174         | 0.5284        | $2.257 \times 10^{-5}$                   |
| <b><i>k</i> = 200</b>              | <b>0.2003</b>  | <b>0.1476</b> | <b><math>1.342 \times 10^{-9}</math></b> | <b>0.2648</b>  | <b>0.2304</b> | <b><math>2.597 \times 10^{-3}</math></b> |
| <i>k</i> = 300                     | 0.0907         | 0.0811        | $2.767 \times 10^{-3}$                   | 0.1501         | 0.1354        | 0.0167                                   |
| <i>k</i> = 400                     | 0.0499         | 0.0498        | 0.7391                                   | 0.0924         | 0.0895        | 0.3417                                   |
| <i>k</i> = 500                     | 0.0298         | 0.0312        | 0.2112                                   | 0.0584         | 0.0605        | 0.1765                                   |
| Number of markers per MB, <i>s</i> |                |               |                                          |                |               |                                          |
| <i>s</i> = 200                     | 0.2561         | 0.1810        | $1.378 \times 10^{-8}$                   | 0.3409         | 0.2901        | $1.173 \times 10^{-4}$                   |
| <b><i>s</i> = 300</b>              | <b>0.2003</b>  | <b>0.1476</b> | <b><math>1.342 \times 10^{-9}</math></b> | <b>0.2648</b>  | <b>0.2304</b> | <b><math>2.597 \times 10^{-3}</math></b> |
| <i>s</i> = 400                     | 0.1647         | 0.1255        | $2.548 \times 10^{-8}$                   | 0.2291         | 0.1946        | $4.176 \times 10^{-5}$                   |
| <i>s</i> = 500                     | 0.1529         | 0.1193        | $9.347 \times 10^{-10}$                  | 0.2105         | 0.1863        | $7.284 \times 10^{-4}$                   |
| <i>s</i> = 600                     | 0.1503         | 0.1138        | $4.130 \times 10^{-9}$                   | 0.1970         | 0.1746        | $6.975 \times 10^{-5}$                   |
| Imputation length                  |                |               |                                          |                |               |                                          |
| <b>100kb</b>                       | <b>0.2003</b>  | <b>0.1476</b> | <b><math>1.342 \times 10^{-9}</math></b> | <b>0.2648</b>  | <b>0.2304</b> | <b><math>2.597 \times 10^{-3}</math></b> |
| 500kb                              | 0.2104         | 0.1494        | $7.789 \times 10^{-10}$                  | 0.2650         | 0.2307        | $5.575 \times 10^{-6}$                   |
| 1Mb                                | 0.2159         | 0.1538        | $7.790 \times 10^{-10}$                  | 0.2755         | 0.2392        | $2.040 \times 10^{-8}$                   |
| 2Mb                                | 0.2495         | 0.1653        | $7.789 \times 10^{-10}$                  | 0.2914         | 0.2551        | $8.263 \times 10^{-9}$                   |

The table is obtained from the data in FIGURES 6A, C and E. Also shown are the *P*-values of the two-tailed Wilcoxon signed-rank tests comparing the discordance rates of the PD and ADCL reference panels. The discordance rates and *P*-values from the initial analysis using *k* = 200, *s* = 300 and imputation length = 100kb are given in bold, with the values obtained from TABLE 2.

TABLE 4: Mean discordance rates between imputed and simulated genotypes for all heterozygous sites with  $0 < \text{MAF} < 0.1$ , using the maximum (haploid) PD, minimum (haploid) ADCL, diploid PD, and diploid ADCL panels, under different input parameter choices

|                               | Haploid panels |               |                                          | Diploid panels |               |                                          |
|-------------------------------|----------------|---------------|------------------------------------------|----------------|---------------|------------------------------------------|
|                               | PD (%)         | ADCL (%)      | $P$ -value                               | PD (%)         | ADCL (%)      | $P$ -value                               |
| Reference panel size, $k$     |                |               |                                          |                |               |                                          |
| $k = 100$                     | 7.2099         | 5.0056        | $3.358 \times 10^{-8}$                   | 8.5331         | 7.3942        | $3.960 \times 10^{-4}$                   |
| <b><math>k = 200</math></b>   | <b>3.0374</b>  | <b>2.1160</b> | <b><math>1.606 \times 10^{-9}</math></b> | <b>3.8164</b>  | <b>3.2103</b> | <b><math>1.871 \times 10^{-4}</math></b> |
| $k = 300$                     | 1.4783         | 1.2425        | $1.484 \times 10^{-4}$                   | 2.1964         | 1.9086        | $3.817 \times 10^{-4}$                   |
| $k = 400$                     | 0.8394         | 0.8156        | 0.2972                                   | 1.3786         | 1.2816        | 0.0757                                   |
| $k = 500$                     | 0.5494         | 0.5413        | 0.7502                                   | 0.9160         | 0.9010        | 0.7138                                   |
| Number of markers per MB, $s$ |                |               |                                          |                |               |                                          |
| $s = 200$                     | 3.4597         | 2.3336        | $3.467 \times 10^{-9}$                   | 4.3339         | 3.5993        | $8.581 \times 10^{-6}$                   |
| <b><math>s = 300</math></b>   | <b>3.0374</b>  | <b>2.1160</b> | <b><math>1.606 \times 10^{-9}</math></b> | <b>3.8164</b>  | <b>3.2103</b> | <b><math>1.871 \times 10^{-4}</math></b> |
| $s = 400$                     | 2.6079         | 1.9485        | $3.270 \times 10^{-9}$                   | 3.5185         | 2.9342        | $1.173 \times 10^{-5}$                   |
| $s = 500$                     | 2.4951         | 1.8300        | $1.810 \times 10^{-9}$                   | 3.4146         | 2.8719        | $7.874 \times 10^{-5}$                   |
| $s = 600$                     | 2.4121         | 1.7891        | $7.368 \times 10^{-9}$                   | 3.2507         | 2.7438        | $1.528 \times 10^{-5}$                   |
| Imputation length             |                |               |                                          |                |               |                                          |
| <b>100kb</b>                  | <b>3.0374</b>  | <b>2.1160</b> | <b><math>1.606 \times 10^{-9}</math></b> | <b>3.8164</b>  | <b>3.2103</b> | <b><math>1.871 \times 10^{-4}</math></b> |
| 500kb                         | 2.8998         | 2.0484        | $7.790 \times 10^{-10}$                  | 3.5755         | 3.0995        | $1.605 \times 10^{-6}$                   |
| 1Mb                           | 3.0180         | 2.1204        | $7.790 \times 10^{-10}$                  | 3.7531         | 3.2439        | $1.231 \times 10^{-8}$                   |
| 2Mb                           | 3.4652         | 2.2648        | $7.790 \times 10^{-10}$                  | 3.9769         | 3.4637        | $9.806 \times 10^{-9}$                   |

The table is obtained from the data in FIGURES 6B, D and F. Also shown are the  $P$ -values of the two-tailed Wilcoxon signed-rank tests comparing the discordance rates of the PD and ADCL reference panels. The discordance rates and  $P$ -values from the initial analysis using  $k = 200$ ,  $s = 300$  and imputation length = 100kb are given in bold, with the values obtained from TABLE 2.

TABLE 5: Mean discordance rates between imputed and 1000 Genomes genotypes, using the maximum-PD and minimum-ADCL panels

|                | PD (%)  | ADCL (%) | <i>P</i> -value        |
|----------------|---------|----------|------------------------|
| All            | 0.8643  | 0.8087   | $2.367 \times 10^{-3}$ |
| Heterozygotes  | 3.9253  | 3.6041   | $9.301 \times 10^{-3}$ |
| MAF (0, 0.1)   | 11.3202 | 10.2176  | 0.0234                 |
| MAF [0.1, 0.2) | 3.1695  | 2.7525   | 0.0274                 |
| MAF [0.2, 0.5] | 1.7302  | 1.5598   | $8.035 \times 10^{-4}$ |

The table is obtained from the data in FIGURES 7 and 8. The comparison is performed over all sites, all heterozygous sites, and heterozygous sites falling into three different MAF groups. Also shown are the *P*-values of the two-tailed Wilcoxon signed-rank tests comparing the discordance rates of the PD and ADCL reference panels.
